# Supplementary material for: Physical activity and lung function association in a healthy community-dwelling European population
Source: Springer Nature journal article supplement (doi:10.1186/s12890-024-02979-x), 2024-04-08
Supplement: MOESM1 [file 26955986]

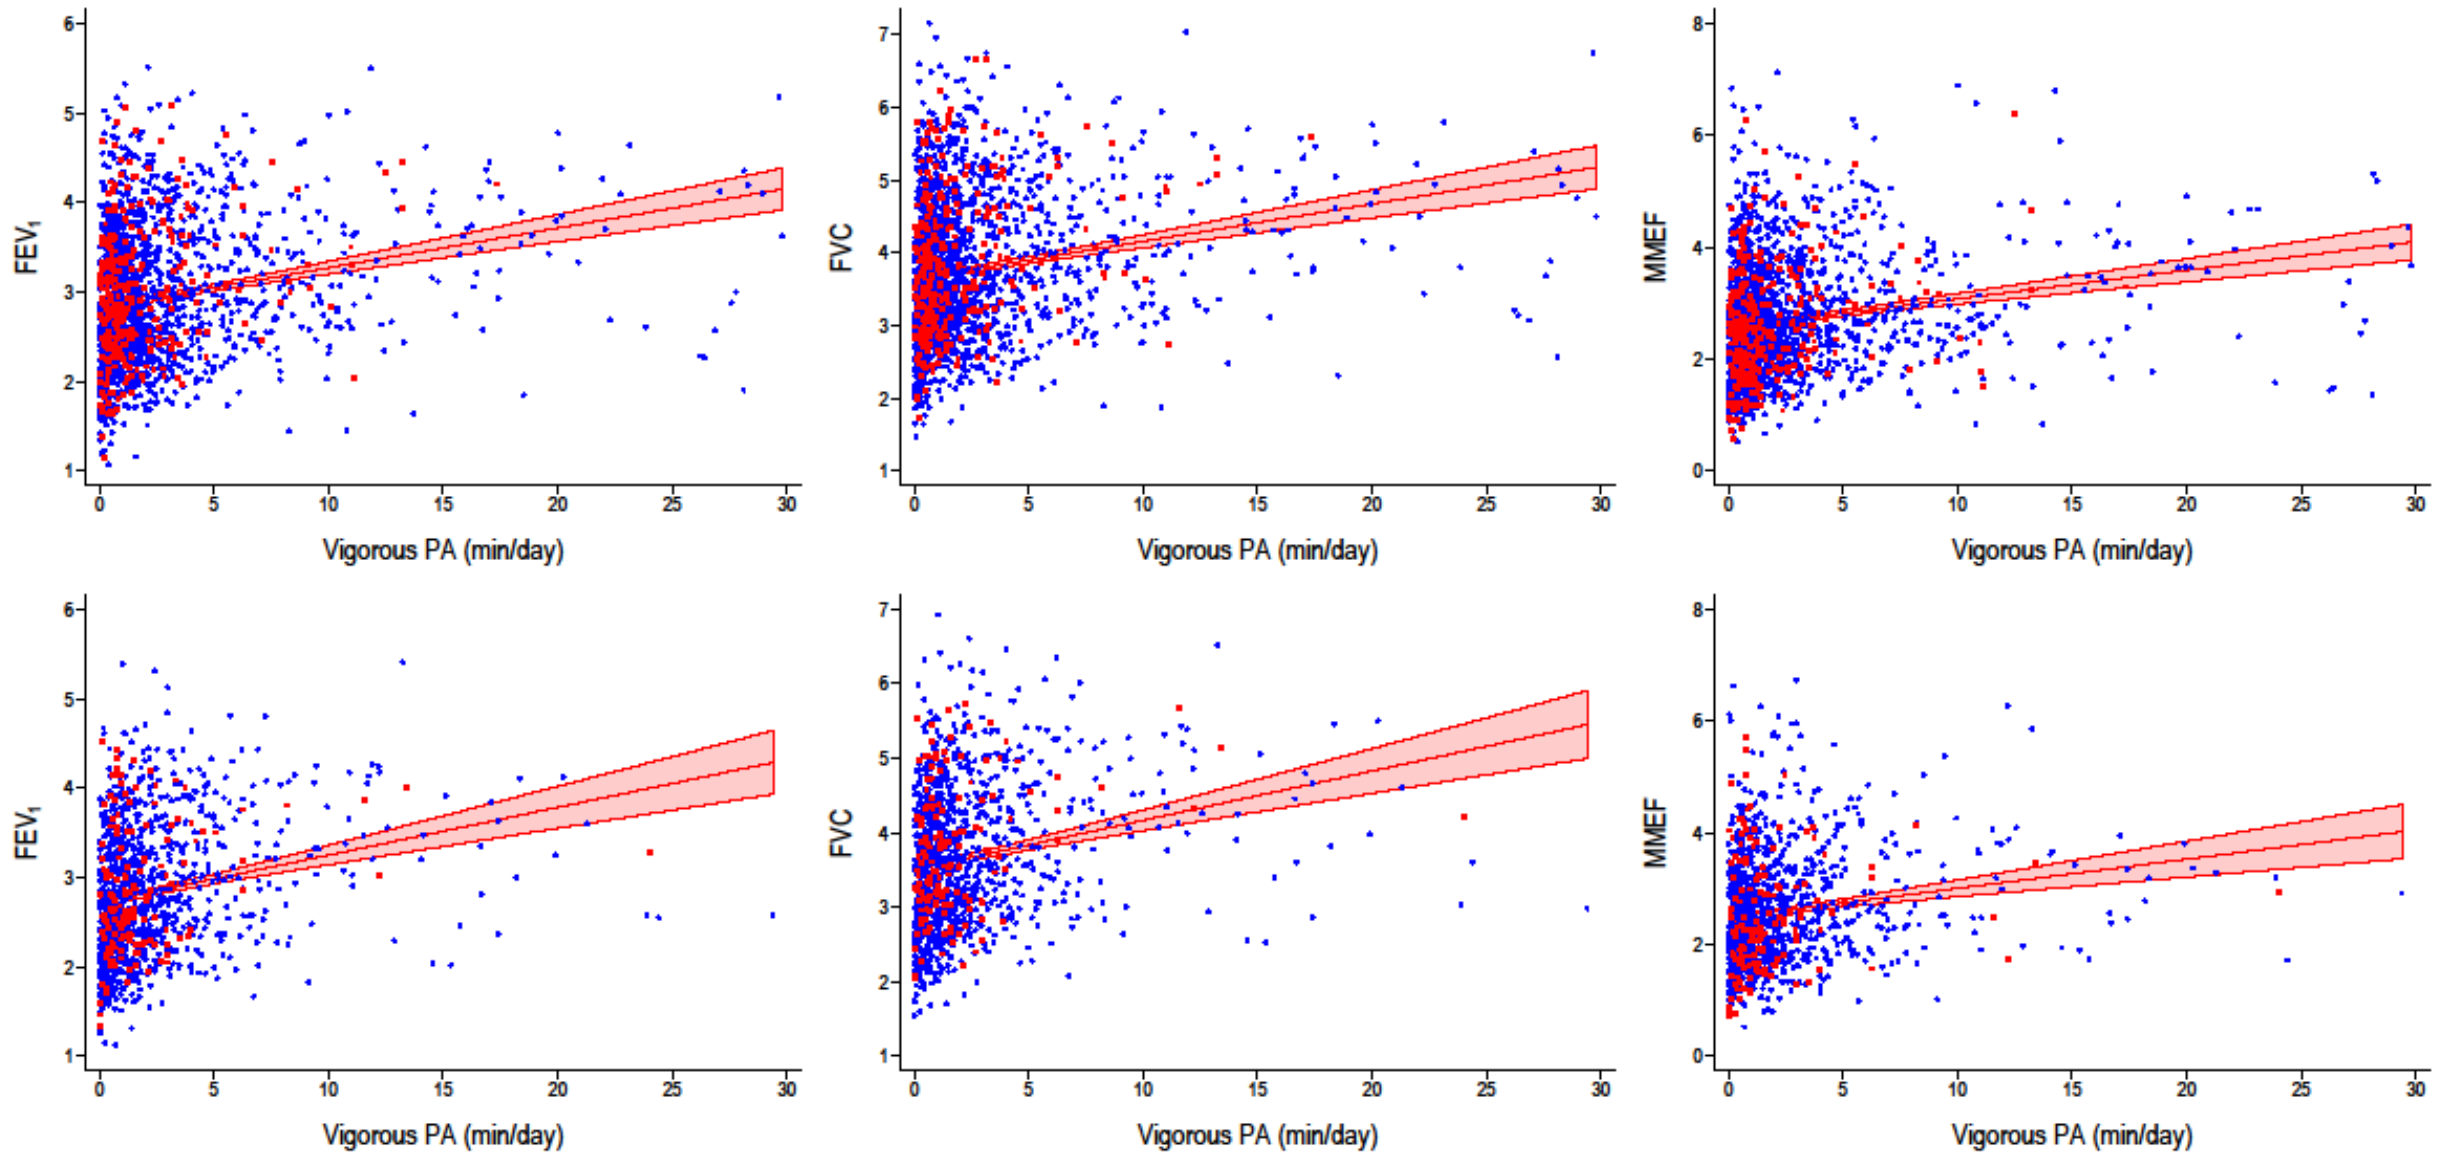

**Supplementary figure 1** : Bivariate associations between vigorous physical activity (PA) and spirometry results in absolute volumes upon baseline study (three top graphs) and at follow-up (three bottom graphs). Blue dots represent never or former smokers; red dots represent current smokers. FEV<sub>1</sub> = Forced Expiratory Volume in 1 second ; FVC = Forced Vital Capacity ; MMEF = Maximum Mid-Expiratory Flow.
