# Supplementary material for: Physical activity and lung function association in a healthy community-dwelling European population
Source: Springer Nature journal article supplement (doi:10.1186/s12890-024-02979-x), 2024-04-08
Supplement: MOESM3 [file 26955986]

## Supplementary information

**Supplementary table 1:** characteristics of included and excluded participants, Pneumolus baseline and follow-up, Lausanne, Switzerland.

|                                      | Baseline (2014-2017) |             |         | Follow-up (2019-2021) |             |         |
|--------------------------------------|----------------------|-------------|---------|-----------------------|-------------|---------|
|                                      | Included             | Excluded    | P-value | Included              | Excluded    | P-value |
| Sample size                          | 1910                 | 2971        |         | 1174                  | 2577        |         |
| Women                                | 1044 (54.7)          | 1645 (55.4) | 0.627   | 627 (53.4)            | 1457 (56.5) | 0.073   |
| Age (years)                          | 62.0 ± 9.7           | 63.5 ± 10.9 | <0.001  | 65.8 ± 9.5            | 65.0 ± 10.1 | 0.019   |
| Body mass index (kg/m <sup>2</sup> ) | 26.3 ± 4.6           | 26.5 ± 4.8  | 0.099   | 26.2 ± 4.3            | 26.4 ± 4.8  | 0.243   |
| Abdominal obesity (WHO)*             | 674 (35.3)           | 1019 (39.6) | 0.003   | 447 (38.1)            | 903 (38.0)  | 0.968   |
| Arterial hypertension §              | 795 (41.6)           | 1468 (52.9) | <0.001  | 581 (49.6)            | 1280 (52.0) | 0.189   |
| Professionally active                | 1093 (57.8)          | 1337 (49.6) | <0.001  | 524 (44.8)            | 1239 (48.4) | 0.040   |
| Education level                      |                      |             | <0.001  |                       |             | 0.037   |
| High                                 | 424 (22.2)           | 607 (20.5)  |         | 260 (22.2)            | 586 (22.8)  |         |
| Middle                               | 548 (28.7)           | 710 (23.9)  |         | 353 (30.1)            | 672 (26.1)  |         |
| Low                                  | 937 (49.1)           | 1651 (55.6) |         | 561 (47.8)            | 1317 (51.2) |         |
| Currently drinks alcohol             | 1562 (81.8)          | 1857 (75.9) | <0.001  | 958 (81.6)            | 1266 (78.1) | 0.022   |
| Smoking status                       |                      |             | <0.001  |                       |             | 0.002   |
| Never                                | 850 (44.5)           | 1036 (40.1) |         | 540 (46.0)            | 955 (43.0)  |         |
| Former                               | 754 (39.5)           | 1000 (38.7) |         | 482 (41.1)            | 874 (39.4)  |         |
| Current                              | 306 (16.0)           | 549 (21.2)  |         | 152 (13.0)            | 392 (15.3)  |         |

\* World Health Organisation (WHO) § defined as blood pressure ≥140/90 mm Hg or antihypertensive drug treatment. Results are expressed as number of participants (column percentage) for categorical variables and as mean ± standard deviation for continuous variables. In excluded participants, percentages are based on non-missing data and might not add up to the total. Education level: low = base education and apprenticeship; middle = high school; high = university. Between-group comparisons performed using chi-square for categorical variables and student's t-test for continuous variables.

**Supplementary table 2:** Coefficients of determination between physical activity levels and spirometry results in percentage of predicted value, overall and stratified by smoking status, Pneumolaus baseline (2014-2017) and follow-up (2018-2021), Lausanne, Switzerland.

|                  | All participants      |             |             | Never or former smokers |             |           | Current smokers       |             |             |
|------------------|-----------------------|-------------|-------------|-------------------------|-------------|-----------|-----------------------|-------------|-------------|
|                  | FEV <sub>1</sub> % PV | FVC % PV    | MMEF % PV   | FEV <sub>1</sub> % PV   | FVC % PV    | MMEF % PV | FEV <sub>1</sub> % PV | FVC % PV    | MMEF % PV   |
| <b>Baseline</b>  | <b>N=1910</b>         |             |             | <b>N=1604</b>           |             |           | <b>N=306</b>          |             |             |
| Inactivity       | <b>1.1%</b>           | <b>1.3%</b> | 0.2%        | <b>1.2%</b>             | <b>1.5%</b> | 0.1%      | 0.5%                  | 0.3%        | 0.0%        |
| Light PA         | <b>1.0%</b>           | <b>1.2%</b> | 0.1%        | <b>0.7%</b>             | <b>0.9%</b> | 0.0%      | <b>2.5%</b>           | <b>2.5%</b> | 0.6%        |
| Moderate PA      | <b>1.1%</b>           | <b>1.4%</b> | 0.1%        | <b>0.6%</b>             | <b>1.0%</b> | 0.0%      | <b>3.7%</b>           | <b>3.8%</b> | 0.9%        |
| Vigorous PA      | <b>1.7%</b>           | <b>1.9%</b> | <b>0.3%</b> | <b>1.2%</b>             | <b>1.5%</b> | 0.1%      | <b>4.2%</b>           | <b>3.7%</b> | <b>1.8%</b> |
| <b>Follow-up</b> | <b>N=1174</b>         |             |             | <b>N=1022</b>           |             |           | <b>N=152</b>          |             |             |
| Inactivity       | <b>0.3%</b>           | <b>0.4%</b> | 0.0%        | <b>0.4%</b>             | <b>0.5%</b> | 0.0%      | 0.0%                  | 0.0%        | 0.1%        |
| Light PA         | <b>1.0%</b>           | <b>1.8%</b> | 0.0%        | <b>1.2%</b>             | <b>2.0%</b> | 0.0%      | 0.3%                  | 0.8%        | 0.4%        |
| Moderate PA      | <b>1.2%</b>           | <b>2.0%</b> | 0.0%        | <b>1.5%</b>             | <b>2.5%</b> | 0.0%      | 0.1%                  | 0.2%        | <b>0.1%</b> |
| Vigorous PA      | <b>1.6%</b>           | <b>2.5%</b> | 0.0%        | <b>1.9%</b>             | <b>3.2%</b> | 0.0%      | 0.1%                  | 0.0%        | <b>0.1%</b> |

FEV<sub>1</sub> = forced expired volume in one second; FVC = forced vital capacity; MMEF = maximum mid-expiratory flow; PA = physical activity; PV = predicted value. Results are expressed as percentage. Significant (p<0.05) associations are indicated in bold characters.

**Supplementary table 3:** Spearman non-parametric correlation coefficients between physical activity levels and spirometry results in absolute volumes, overall and stratified by smoking status, Pneumolous baseline (2014-2017) and follow-up (2018-2021), Lausanne, Switzerland.

|                  | All participants |               |               | Never or former smokers |               |               | Current smokers  |              |              |
|------------------|------------------|---------------|---------------|-------------------------|---------------|---------------|------------------|--------------|--------------|
|                  | FEV <sub>1</sub> | FVC           | MMEF          | FEV <sub>1</sub>        | FVC           | MMEF          | FEV <sub>1</sub> | FVC          | MMEF         |
| <b>Baseline</b>  |                  | <b>N=1910</b> |               |                         | <b>N=1604</b> |               |                  | <b>N=306</b> |              |
| Inactivity       | <b>-0.053</b>    | -0.041        | <b>-0.070</b> | <b>-0.066</b>           | <b>-0.057</b> | <b>-0.076</b> | 0.006            | 0.020        | -0.018       |
| Light PA         | 0.020            | -0.005        | <b>0.073</b>  | 0.012                   | -0.011        | <b>0.063</b>  | 0.078            | 0.064        | 0.100        |
| Moderate PA      | <b>0.181</b>     | <b>0.157</b>  | <b>0.185</b>  | <b>0.182</b>            | <b>0.161</b>  | <b>0.179</b>  | <b>0.196</b>     | <b>0.176</b> | <b>0.189</b> |
| Vigorous PA      | <b>0.269</b>     | <b>0.249</b>  | <b>0.241</b>  | <b>0.276</b>            | <b>0.260</b>  | <b>0.238</b>  | <b>0.247</b>     | <b>0.220</b> | <b>0.229</b> |
| <b>Follow-up</b> |                  | <b>N=1174</b> |               |                         | <b>N=1022</b> |               |                  | <b>N=152</b> |              |
| Inactivity       | <b>-0.073</b>    | -0.054        | <b>-0.087</b> | <b>-0.084</b>           | <b>-0.068</b> | <b>-0.100</b> | 0.010            | 0.027        | 0.009        |
| Light PA         | <b>0.064</b>     | 0.049         | <b>0.073</b>  | <b>0.069</b>            | 0.051         | <b>0.087</b>  | 0.044            | 0.059        | -0.009       |
| Moderate PA      | <b>0.211</b>     | <b>0.196</b>  | <b>0.184</b>  | <b>0.220</b>            | <b>0.204</b>  | <b>0.200</b>  | 0.146            | <b>0.161</b> | 0.080        |
| Vigorous PA      | <b>0.299</b>     | <b>0.294</b>  | <b>0.230</b>  | <b>0.312</b>            | <b>0.310</b>  | <b>0.238</b>  | <b>0.191</b>     | <b>0.187</b> | 0.158        |

FEV<sub>1</sub> = forced expired volume in one second; FVC = forced vital capacity; MMEF = maximum mid-expiratory flow; PA = physical activity. Results are expressed as Spearman rank correlation coefficients. Significant (p<0.05) correlations are indicated in bold characters.

**Supplementary table 4:** Multivariable analysis of the associations between physical activity levels and spirometry results in absolute volumes, overall and stratified by smoking status, Pneumolaus baseline (2014-2017) and follow-up (2018-2021), Lausanne, Switzerland.

|                  | All participants |               |               | Never or former smokers |               |               | Current smokers  |              |              |
|------------------|------------------|---------------|---------------|-------------------------|---------------|---------------|------------------|--------------|--------------|
|                  | FEV <sub>1</sub> | FVC           | MMEF          | FEV <sub>1</sub>        | FVC           | MMEF          | FEV <sub>1</sub> | FVC          | MMEF         |
| <b>Baseline</b>  |                  | <b>N=1910</b> |               | <b>N=1604</b>           |               |               | <b>N=306</b>     |              |              |
| Inactivity       | 0.035            | 0.039         | 0.018         | 0.032                   | 0.338         | 0.017         | 0.052            | 0.064        | 0.026        |
| Light PA         | <b>-0.129</b>    | <b>-0.144</b> | <b>-0.063</b> | <b>-0.152</b>           | <b>-0.166</b> | <b>-0.080</b> | -0.005           | -0.019       | 0.026        |
| Moderate PA      | -0.016           | -0.023        | -0.007        | -0.037                  | -0.044        | -0.023        | <b>0.115</b>     | 0.109        | 0.085        |
| Vigorous PA      | <b>0.105</b>     | <b>0.101</b>  | <b>0.074</b>  | <b>0.092</b>            | <b>0.091</b>  | <b>0.055</b>  | <b>0.186</b>     | <b>0.164</b> | <b>0.204</b> |
| <b>Follow-up</b> |                  | <b>N=1174</b> |               | <b>N=1022</b>           |               |               | <b>N=152</b>     |              |              |
| Inactivity       | 0.030            | 0.041         | 0.011         | 0.029                   | 0.042         | 0.001         | 0.060            | 0.071        | 0.070        |
| Light PA         | <b>-0.094</b>    | <b>-0.097</b> | <b>-0.078</b> | <b>-0.109</b>           | <b>-0.117</b> | <b>-0.073</b> | -0.025           | 0.010        | -0.119       |
| Moderate PA      | -0.003           | -0.004        | -0.020        | -0.018                  | -0.023        | -0.022        | 0.080            | 0.115        | -0.034       |
| Vigorous PA      | <b>0.122</b>     | <b>0.111</b>  | <b>0.101</b>  | <b>0.119</b>            | <b>0.108</b>  | <b>0.098</b>  | 0.130            | 0.125        | 0.105        |

FEV<sub>1</sub> = forced expired volume in one second; FVC = forced vital capacity; MMEF = maximum mid-expiratory flow; PA = physical activity. Results are expressed as beta-standardized coefficients. Statistical analysis conducted using multivariable regression adjusting for age (continuous) and body mass index (continuous), and for smoking categories (never, former, current) when all participants were considered. Significant (p<0.05) associations are indicated in bold characters.

**Supplementary table 5:** Coefficients of determination between physical activity levels and spirometry results in absolute volumes, overall and stratified by smoking status, Pneumolous baseline (2014-2017) and follow-up (2018-2021), Lausanne, Switzerland.

|                  | All participants |             |             | Never or former smokers |             |             | Current smokers  |             |             |
|------------------|------------------|-------------|-------------|-------------------------|-------------|-------------|------------------|-------------|-------------|
|                  | FEV <sub>1</sub> | FVC         | MMEF        | FEV <sub>1</sub>        | FVC         | MMEF        | FEV <sub>1</sub> | FVC         | MMEF        |
| <b>Baseline</b>  | <b>N=1910</b>    |             |             | <b>N=1604</b>           |             |             | <b>N=306</b>     |             |             |
| Inactivity       | <b>0.3%</b>      | 0.2%        | <b>0.5%</b> | <b>0.4%</b>             | <b>0.3%</b> | 0.6%        | 0.0%             | 0.0%        | 0.0%        |
| Light PA         | 0.0%             | 0.0%        | 0.5%        | 0.0%                    | 0.0%        | 0.4%        | 0.6%             | 0.4%        | 1.0%        |
| Moderate PA      | <b>3.3%</b>      | <b>2.5%</b> | <b>3.4%</b> | <b>3.3%</b>             | <b>2.6%</b> | <b>3.2%</b> | <b>3.8%</b>      | <b>3.1%</b> | <b>3.6%</b> |
| Vigorous PA      | <b>7.2%</b>      | <b>6.2%</b> | <b>5.8%</b> | <b>7.6%</b>             | <b>6.8%</b> | <b>5.7%</b> | <b>6.1%</b>      | <b>4.8%</b> | <b>5.2%</b> |
| <b>Follow-up</b> | <b>N=1174</b>    |             |             | <b>N=1022</b>           |             |             | <b>N=152</b>     |             |             |
| Inactivity       | <b>0.5%</b>      | 0.3%        | <b>0.8%</b> | <b>0.7%</b>             | <b>0.5%</b> | 1.0%        | 0.0%             | 0.1%        | 0.0%        |
| Light PA         | <b>0.4%</b>      | 0.2%        | <b>0.5%</b> | 0.5%                    | 0.3%        | 0.8%        | 0.2%             | 0.3%        | 0.0%        |
| Moderate PA      | <b>4.5%</b>      | <b>3.8%</b> | <b>3.4%</b> | <b>4.8%</b>             | <b>4.2%</b> | 4.0%        | 2.1%             | <b>2.6%</b> | <b>0.6%</b> |
| Vigorous PA      | <b>8.9%</b>      | <b>8.6%</b> | <b>5.3%</b> | <b>9.7%</b>             | <b>9.6%</b> | 5.7%        | <b>3.6%</b>      | <b>3.5%</b> | <b>2.5%</b> |

FEV<sub>1</sub> = forced expired volume in one second; FVC = forced vital capacity; MMEF = maximum mid-expiratory flow; PA = physical activity. Results are expressed as percentage. Significant (p<0.05) associations are indicated in bold characters.
